# Supplementary material for: Vinculin head–tail interaction defines multiple early mechanisms for cell substrate rigidity sensing
Source: Royal Society of Chemistry journal article supplement (doi:10.1039/c5ib00307e), 2016-05-04
Supplement: c5ib00307e1.pdf [file c5ib00307e1.pdf]

**Table S1:** FCCS results between paxillin or FAK on the one hand, and talin, vinculin or T12 on the other hand. No = no cross-correlation detected.

|                         | <b>Talin-GFP</b> | <b>Vinculin-GFP</b> | <b>T12-GFP</b> |
|-------------------------|------------------|---------------------|----------------|
| <b>Paxillin-mCherry</b> |                  | No                  | No             |
| <b>FAK-mCherry</b>      | No               | No                  | No             |
