# Supplementary figures and images for: Vinculin head–tail interaction defines multiple early mechanisms for cell substrate rigidity sensing
Source: Royal Society of Chemistry journal article supplement (doi:10.1039/c5ib00307e), 2016-05-04

Fig. S3

**A**

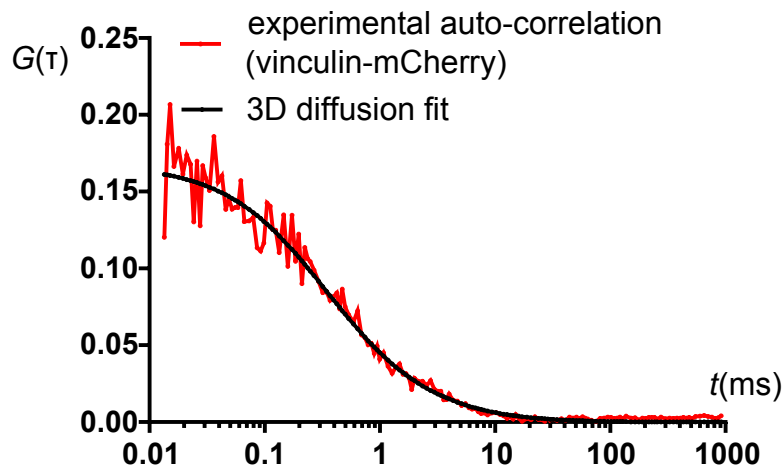

**B**

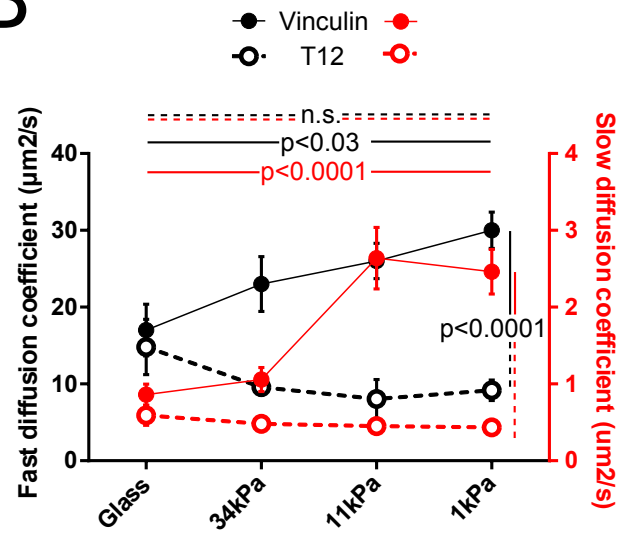

**C**

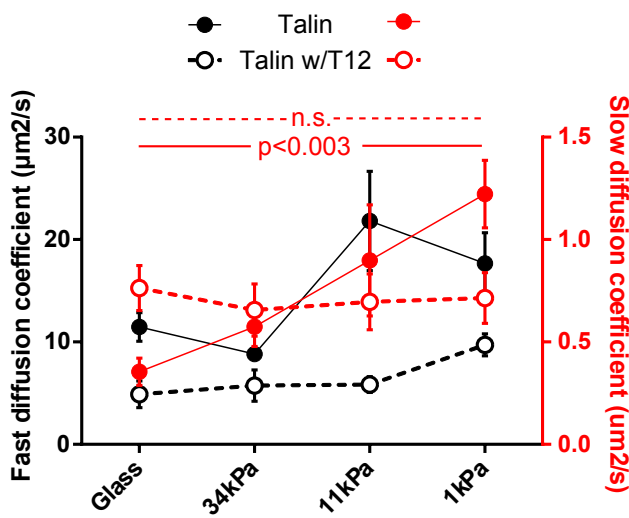

**D**

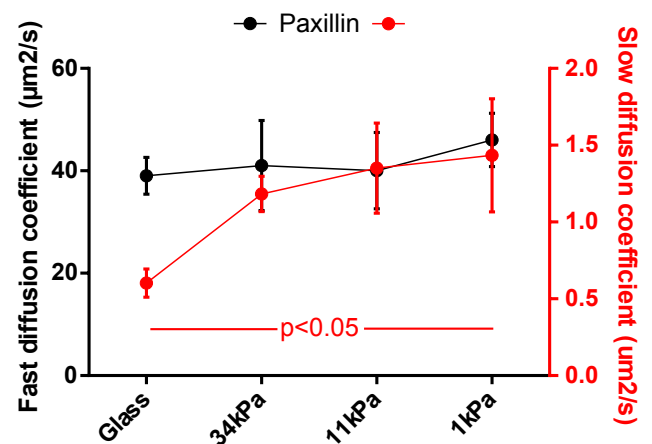

**E**

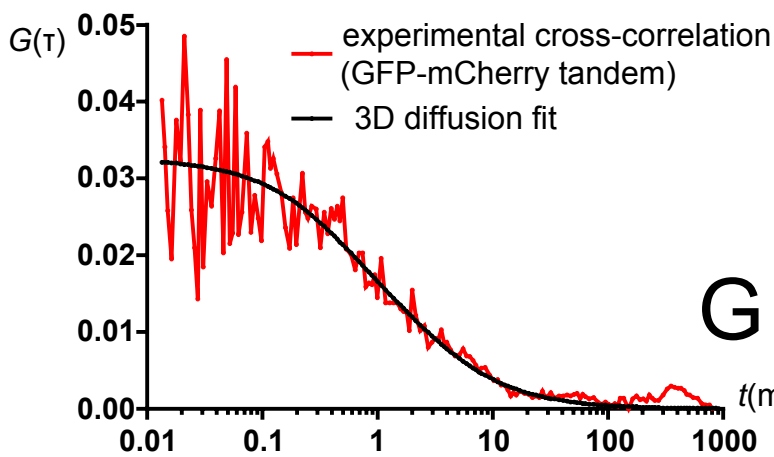

**F**

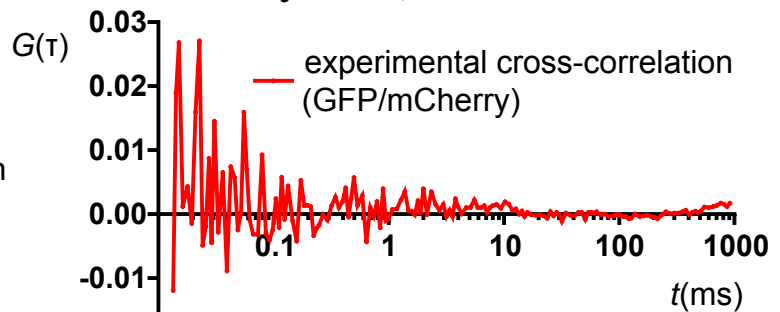

**G**

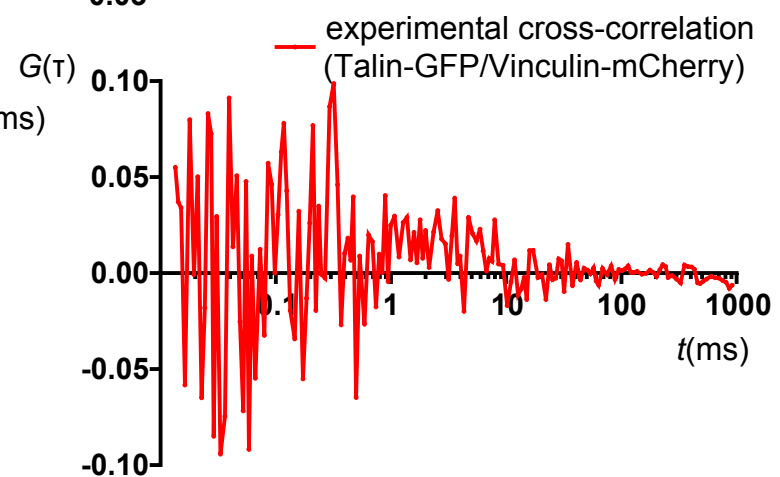

Supplement: c5ib00307e5.pdf [file c5ib00307e5.pdf]

# Fig. S4

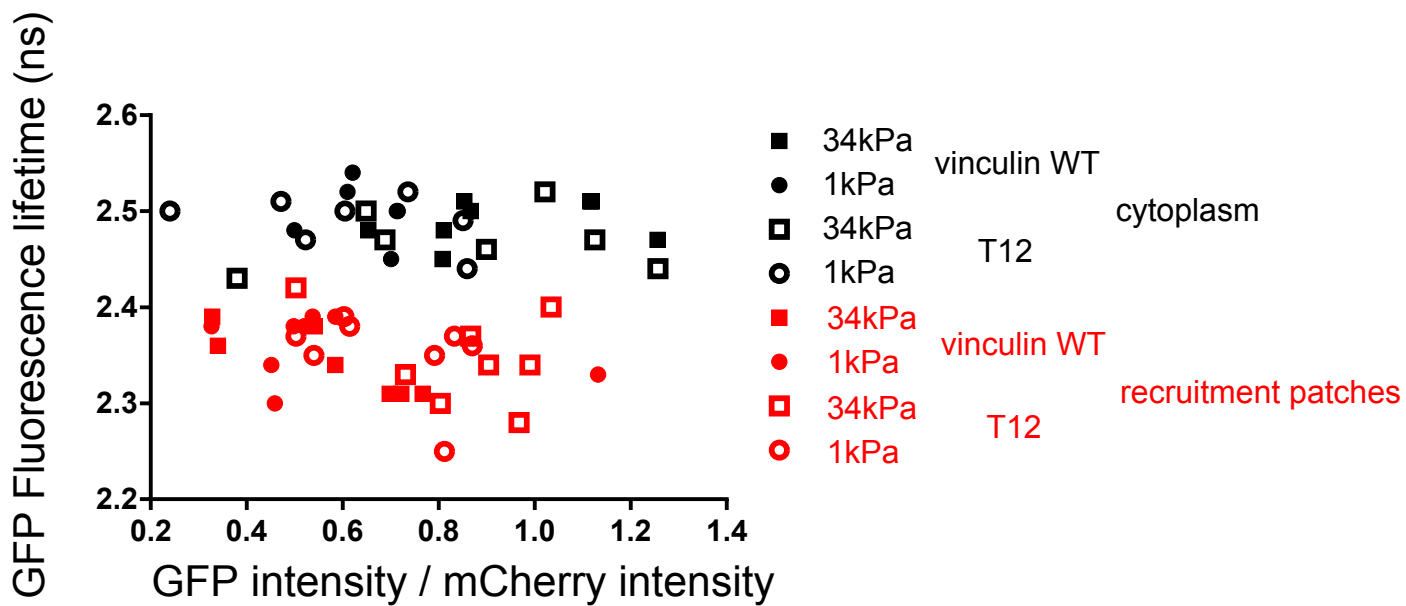

Supplement: c5ib00307e6.pdf [file c5ib00307e6.pdf]
